# Supplementary material
Source: Springer Nature journal article supplement (https://www.springermedizin.de/resource/supplementary/12916_2010_300_MOESM2_ESM.pdf/9599586)

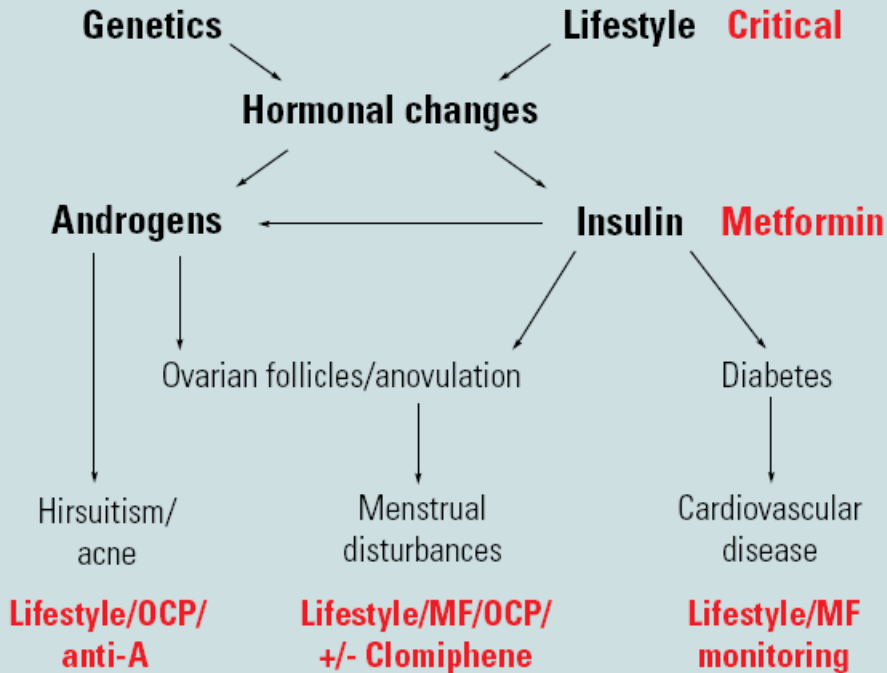

anti-A – antiandrogens

MF – metformin

OCP – oral contraceptive pill

Supplement: MOESM2 [file 9599586]
